# Supplementary material
Source: Springer Nature journal article supplement (https://www.springermedizin.de/resource/supplementary/13256_2012_2493_MOESM2_ESM.pdf/9650362)

**A**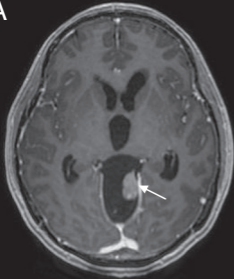**B**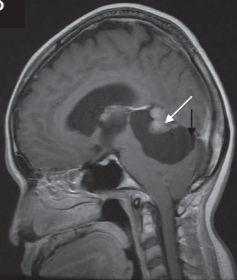

Supplement: MOESM2 [file 9650362]
